# Supplementary material for: Benzotrithiophene-based MOFs: interchromophoric interactions affected Ln(iii) crystallization selectivity and optoelectronic properties
Source: Royal Society of Chemistry journal article supplement (doi:10.1039/d1dt02515e), 2021-01-01
Supplement: d1dt02515e1.pdf [file d1dt02515e1.pdf]

## **Electronic Supplementary Information**

### **Benzotrithiophene based MOFs: interchromophoric interaction affected Ln(III) crystallization selectivity and optoelectronic property**

Feng-Yang Xie, Qi Yang, Jia-Si Wang, Hong-Yi Yu, Yue Li\* and Wen-Juan Ruan\*

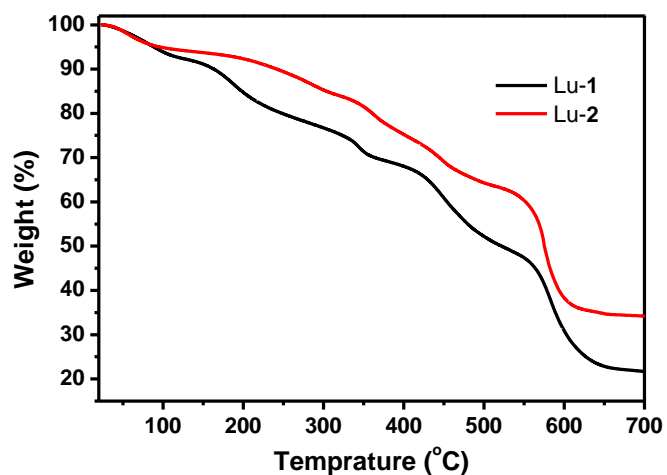

**Fig. S1** TGA curves of as-prepared Lu-1 and Lu-2 in air atmosphere. The overall weight losses of Lu-1 and Lu-2 from room temperature to 700 °C are 78.33% and 65.81%, respectively, which could be assigned to the loss of all H<sub>2</sub>O molecules and organic components (calcd. 78.58% for Lu-1 and 65.88% for Lu-2).

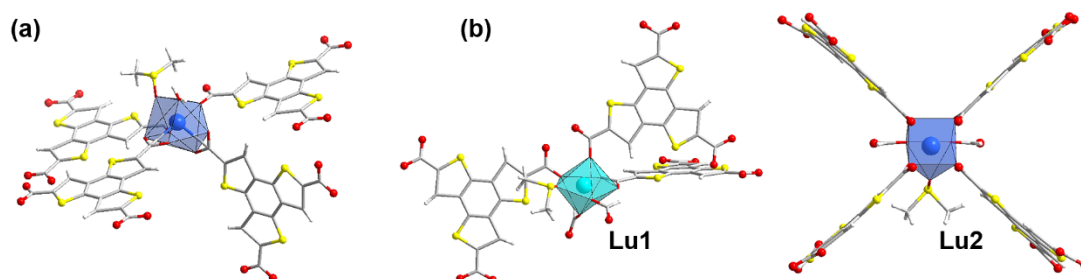

**Fig. S2** Coordination environments of Lu<sup>3+</sup> ions in (a) Lu-1 and (b) Lu-2.

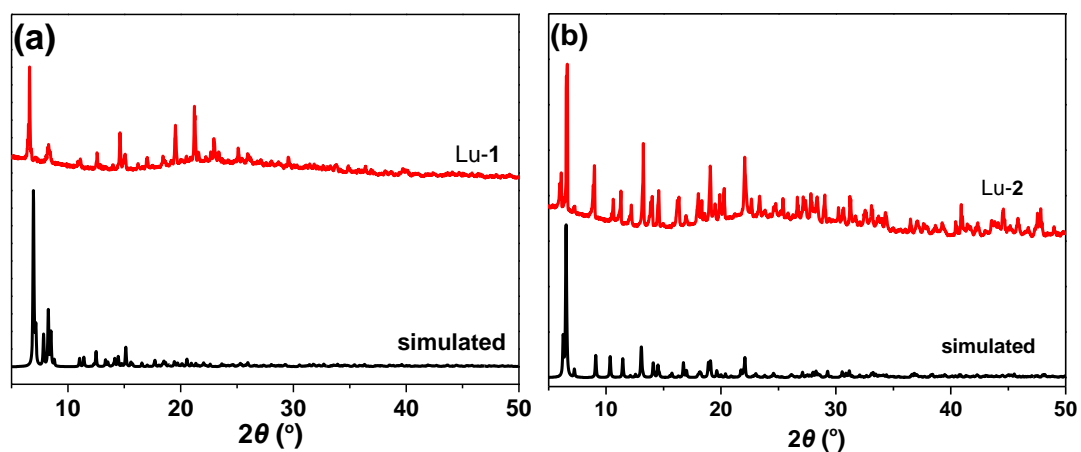

**Fig. S3** PXRD patterns of as-prepared (a) Lu-1 and (b) Lu-2 samples.

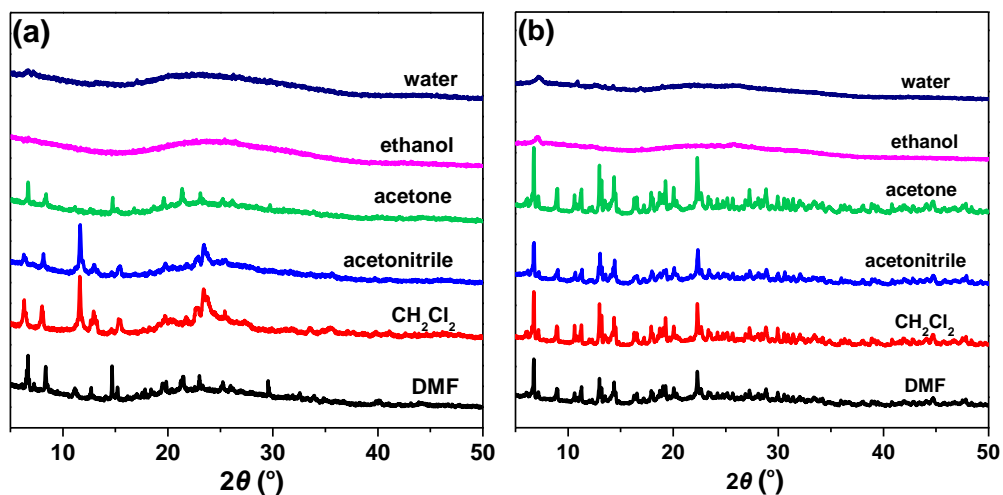

Fig. S4 PXRD patterns of (a) Lu-1 and (b) Lu-2 samples after 12 hours of shaking in different solvents.

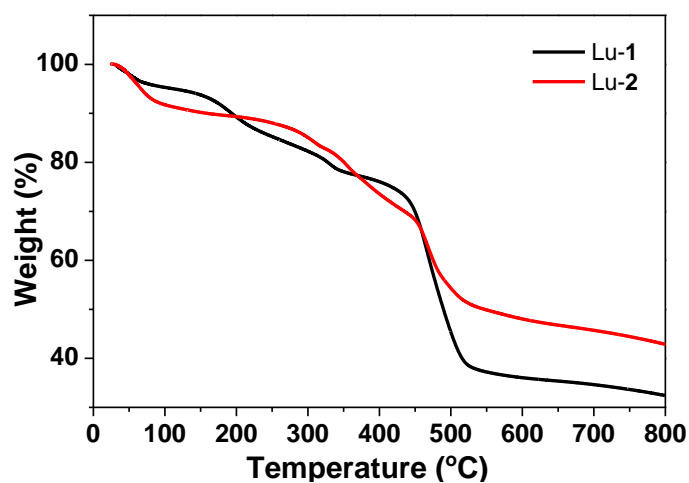

Fig. S5 TGA traces of Lu-1 and Lu-2 in  $\text{N}_2$  atmosphere. Before measurement, the samples were exchanged with  $\text{CH}_2\text{Cl}_2$  for 72 h and then dried in vacuum at  $40^\circ\text{C}$  to remove the solvent guests in channels.

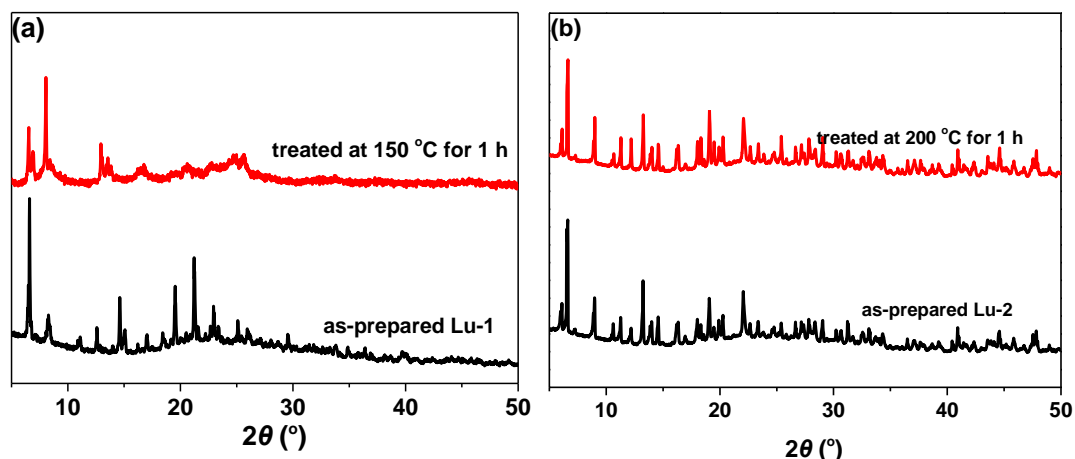

**Fig. S6** PXR D patterns of (a) Lu-1 and (b) Lu-2 before and after thermal treatment.

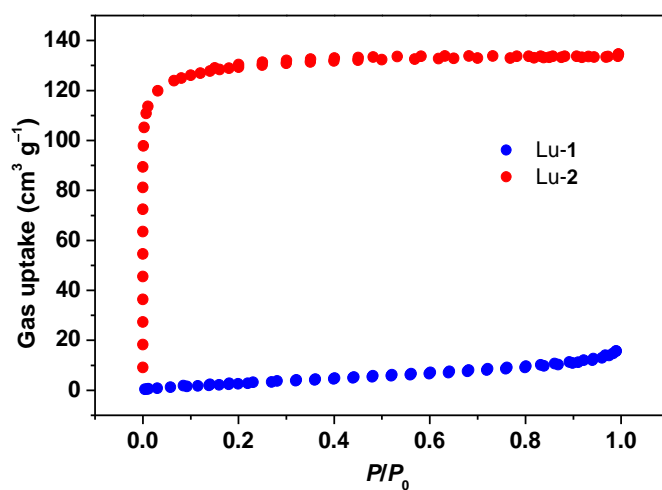

**Fig. S7**  $N_2$  sorption isotherms for Lu-1 and Lu-2 at 77 K. Before measurement, the samples were exchanged with  $CH_2Cl_2$  for 72 h and then dried in vacuum at 40 °C to remove the solvent guests in channels.

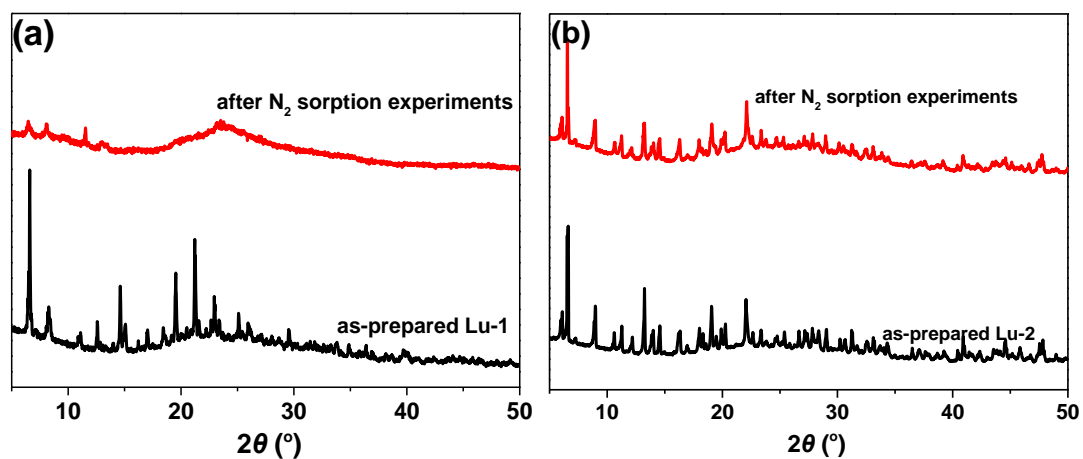

**Fig. S8** PXRD patterns of (a) Lu-1 and (b) Lu-2 before and after N<sub>2</sub> sorption experiments.

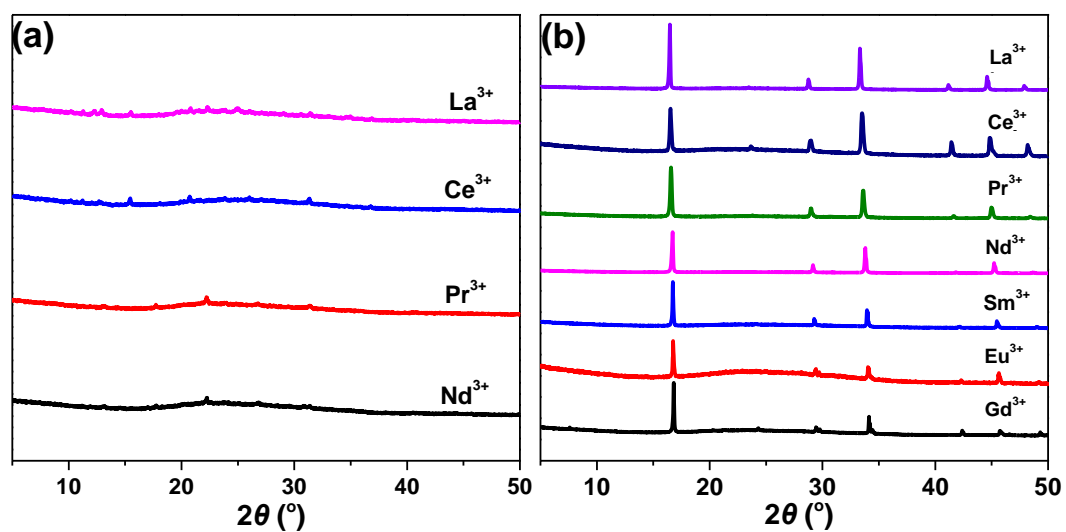

**Fig. S9** PXRD patterns of the samples obtained from the replacement of Lu<sup>3+</sup> (a) by La<sup>3+</sup>-Nd<sup>3+</sup> in the synthetic conditions of Lu-1 and (b) by La<sup>3+</sup>-Gd<sup>3+</sup> in the synthetic conditions of Lu-2.

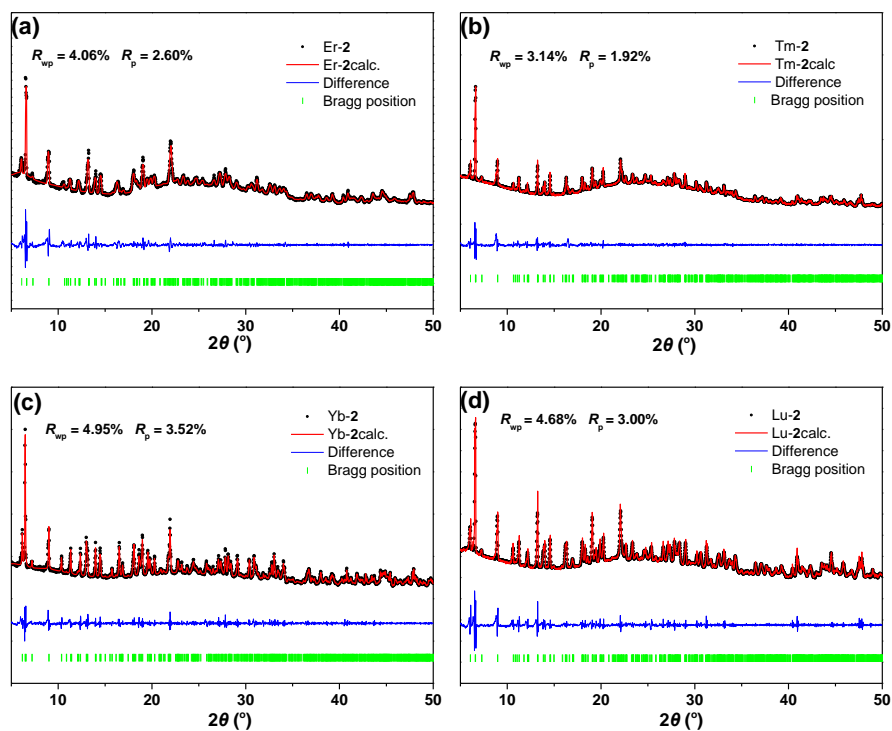

**Fig. S10** Pawley refinements (using the Material Studio 8.0 program) of the recorded PXR data of (a) Er-, (b) Tm-, (c) Yb- and (d) Lu-2s.

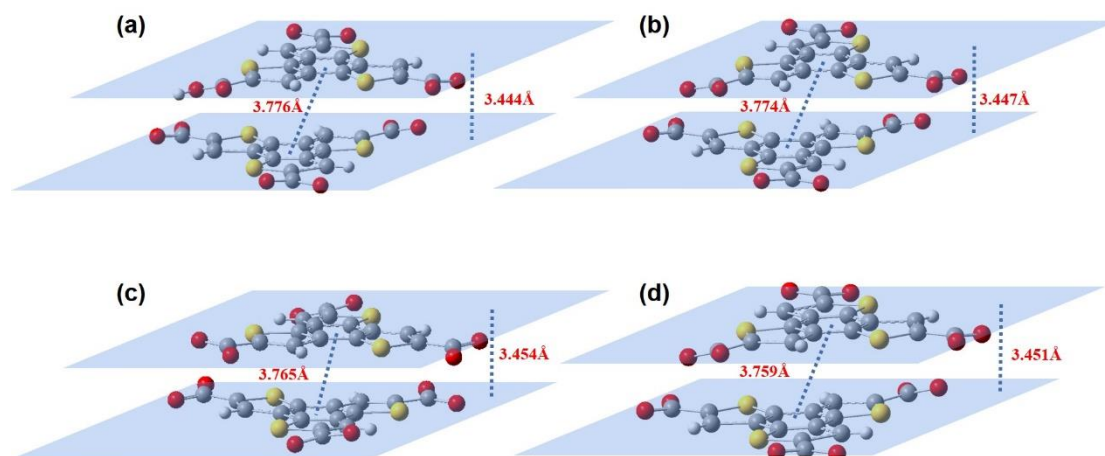

**Fig. S11** Anti-parallel arrangement of  $\text{BTTC}^{3-}$  ligands in (a) Er-2, (b) Tm-2, (c) Yb-2 and (d) Lu-2.

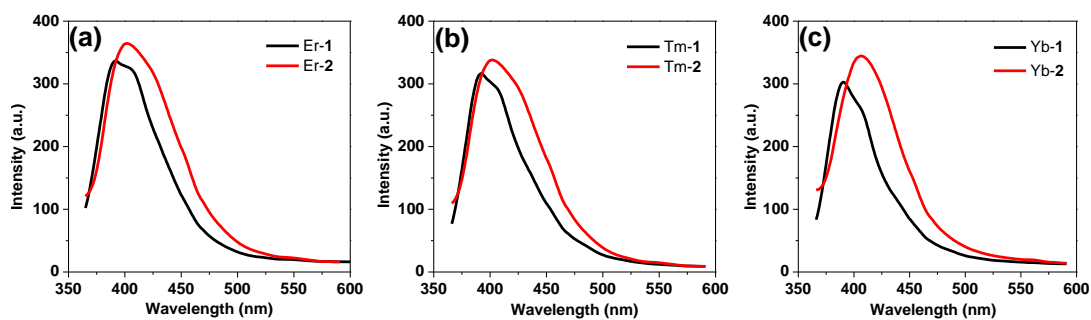

Fig. S12 Photoluminescence spectra of (a) Er-1/2, (b) Tm-1/2 and (c) Yb-1/2 ( $\lambda_{\text{ex}} = 304\text{nm}$ ).

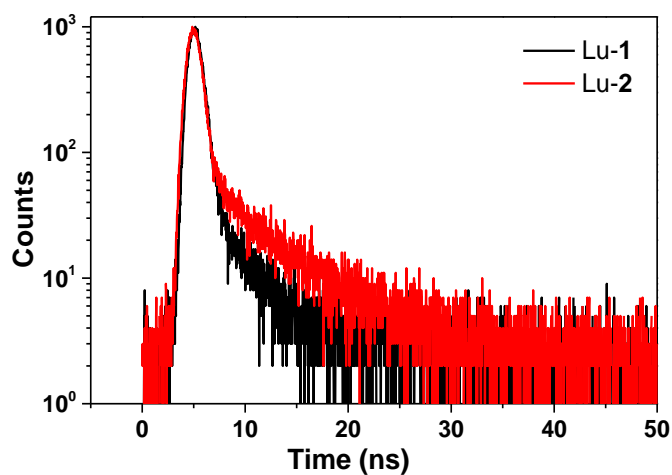

Fig. S13 Time-resolved decays of the emission bands at 400 nm for Lu-1 and Lu-2.

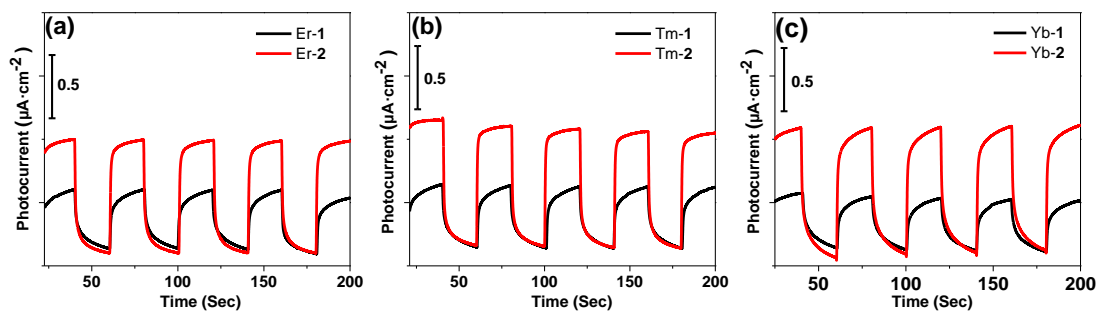

Fig. S14 Photocurrent responses of (a) Er-1/2, (b) Tm-1/2 and (c) Yb-1/2.

**Table S1** Crystal data and structure refinement for Ln-1 and Ln-2

|                                          | Er-2                                | Tm-2                                | Yb-2                                | Lu-2                                | Lu-1                                |
|------------------------------------------|-------------------------------------|-------------------------------------|-------------------------------------|-------------------------------------|-------------------------------------|
| Empirical formula                        | $C_{80}H_{78}O_{50}S_{19}Er_6$      | $C_{80}H_{78}O_{50}S_{19}Tm_6$      | $C_{80}H_{78}O_{50}S_{19}Yb_6$      | $C_{80}H_{78}O_{50}S_{19}Lu_6$      | $C_{48}H_{66}O_{24}S_{15}Lu_2$      |
| Formula weight                           | 3452.15                             | 3462.17                             | 3486.89                             | 3498.41                             | 1857.58                             |
| $T(K)$                                   | 100                                 | 100                                 | 100                                 | 100                                 | 100                                 |
| Wavelength ( $\text{\AA}$ )              | 0.71073                             | 0.71073                             | 0.71073                             | 0.71073                             | 1.54184                             |
| Crystal system                           | monoclinic                          | monoclinic                          | monoclinic                          | monoclinic                          | monoclinic                          |
| Space group                              | $I2/m$                              | $I2/m$                              | $I2/m$                              | $I2/m$                              | $C2/c$                              |
| $a$ ( $\text{\AA}$ )                     | 15.0482(4)                          | 15.0000(8)                          | 14.9644(3)                          | 14.9505(4)                          | 24.5391(10)                         |
| $b$ ( $\text{\AA}$ )                     | 28.3988(5)                          | 28.3529(10)                         | 28.2692(5)                          | 28.1937(6)                          | 15.4070(9)                          |
| $c$ ( $\text{\AA}$ )                     | 17.0500(5)                          | 17.0305(9)                          | 17.0535(4)                          | 17.1041(6)                          | 26.8983(9)                          |
| $\alpha$ ( $^\circ$ )                    | 90                                  | 90                                  | 90                                  | 90                                  | 90                                  |
| $\beta$ ( $^\circ$ )                     | 115.635(3)                          | 115.549(6)                          | 115.487(3)                          | 115.237(3)                          | 113.341(5)                          |
| $\gamma$ ( $^\circ$ )                    | 90                                  | 90                                  | 90                                  | 90                                  | 90                                  |
| $V$ ( $\text{\AA}^3$ )                   | 6569.1(3)                           | 6534.7(6)                           | 6512.1(3)                           | 6521.4(4)                           | 9337.3(8)                           |
| $Z$                                      | 2                                   | 2                                   | 2                                   | 2                                   | 4                                   |
| $\rho_{\text{calc}}$ ( $\text{g/cm}^3$ ) | 1.745                               | 1.759                               | 1.778                               | 1.781                               | 1.321                               |
| $\mu$ ( $\text{mm}^{-1}$ )               | 4.168                               | 4.410                               | 4.647                               | 4.879                               | 7.548                               |
| $F(000)$                                 | 2902.0                              | 2916.0                              | 2928.0                              | 2940.0                              | 2344.0                              |
| Ref. collected                           | 16669                               | 16084                               | 21802                               | 21702                               | 18776                               |
| Independent ref.                         | 5869 ( $R_{\text{int}} = 0.0226$ )  | 5836 ( $R_{\text{int}} = 0.0285$ )  | 8198 ( $R_{\text{int}} = 0.0197$ )  | 8393 ( $R_{\text{int}} = 0.0186$ )  | 8214 ( $R_{\text{int}} = 0.0558$ )  |
| Completeness                             | 99.4% ( $\vartheta = 25.0^\circ$ )  | 99.4% ( $\vartheta = 25.0^\circ$ )  | 99.1% ( $\vartheta = 30.15^\circ$ ) | 99.0% ( $\vartheta = 30.45^\circ$ ) | 98.7% ( $\vartheta = 67.0^\circ$ )  |
| Data/restraints/parameters               | 5869/595/457                        | 5836/554/469                        | 8198/612/493                        | 8393/611/484                        | 8214/82/325                         |
| Gof                                      | 1.045                               | 1.047                               | 1.030                               | 1.045                               | 1.095                               |
| Final $R$ indices [ $>2\sigma(I)$ ]      | $R_1 = 0.0525$ ,<br>$wR_2 = 0.1283$ | $R_1 = 0.0465$ ,<br>$wR_2 = 0.1199$ | $R_1 = 0.0445$ ,<br>$wR_2 = 0.1033$ | $R_1 = 0.0260$ ,<br>$wR_2 = 0.0719$ | $R_1 = 0.0810$ ,<br>$wR_2 = 0.2462$ |
| $R$ indices (all data)                   | $R_1 = 0.0556$ ,<br>$wR_2 = 0.1308$ | $R_1 = 0.0519$ ,<br>$wR_2 = 0.1244$ | $R_1 = 0.0463$ ,<br>$wR_2 = 0.1043$ | $R_1 = 0.0286$ ,<br>$wR_2 = 0.0731$ | $R_1 = 0.0937$ ,<br>$wR_2 = 0.2558$ |

**Table S2** Crystallization electivity of 7- and 6-coordinated Ln-MOFs towards Ln<sup>3+</sup> ions

| MOF                                         | Coordinated numbers | Applicable Ln <sup>3+</sup> ions                                                                                                   | Ref.      |
|---------------------------------------------|---------------------|------------------------------------------------------------------------------------------------------------------------------------|-----------|
| $[\text{Ln}(\text{HCOO})(\text{D-cam})]_n$  | 7                   | Dy <sup>3+</sup> , Ho <sup>3+</sup> , Er <sup>3+</sup>                                                                             | 1         |
| CPM-29                                      | 7                   | Tb <sup>3+</sup> , Dy <sup>3+</sup> , Ho <sup>3+</sup> , Er <sup>3+</sup> , Tm <sup>3+</sup> , Yb <sup>3+</sup> , Lu <sup>3+</sup> | 2         |
| CPM-66B                                     | 6                   | Er <sup>3+</sup> , Tm <sup>3+</sup> , Yb <sup>3+</sup> , Lu <sup>3+</sup>                                                          | 3         |
| $\text{Ln}(\text{C}_9\text{H}_9\text{O}_6)$ | 6                   | Er <sup>3+</sup> , Tb <sup>3+</sup>                                                                                                | 4         |
| Ln-2                                        | 7                   | Er <sup>3+</sup> , Tm <sup>3+</sup> , Yb <sup>3+</sup> , Lu <sup>3+</sup>                                                          | This work |



## References

1. M.-L. Sun, X. Zhang, Y.-Y. Huang, Q.-P. Lin, Y.-Y. Qin and Y.-G. Yao, *New J. Chem.*, 2014, **38**, 55–58.
2. X. Zhao, M. Wong, C. Mao, T. X. Trieu, J. Zhang, P. Feng and X. Bu, *J. Am. Chem. Soc.*, 2014, **136**, 12572–12575.
3. H. Yang, F. Peng, D. E. Schier, S. A. Markotic, X. Zhao, A. N. Hong, Y. Wang, P. Feng and X. Bu, *Angew. Chem. Int. Ed.*, 2021, **60**, 11148–11152.
4. D. T. de Lill and C. L. Cahill, *Chem. Commun.*, 2006, **47**, 4946–4948.
